# Supplementary material
Source: PubMed Central journal article supplement (PMC6037291)
Supplement: NIHMS78358-supplement-Supplementary_information.pdf [file NIHMS78358-supplement-Supplementary_information.pdf]

## Supplementary Online Content

Davis DHJ, Muniz-Terrera G, Keage HAD, et al; Epidemiological Clinicopathological Studies in Europe (EClipSE) Collaborative Members. Association of delirium with cognitive decline in late life: a neuropathologic study of 3 population-based cohort studies. *JAMA Psychiatry*. Published online January 18, 2017. doi:10.1001/jamapsychiatry.2016.3423

### **eAppendix.** Neuropsychological Evaluation of the Cohorts

This supplementary material has been provided by the authors to give readers additional information about their work.

**eAppendix.** Neuropsychological Evaluation of the Cohorts

**Vantaa 85+ study**

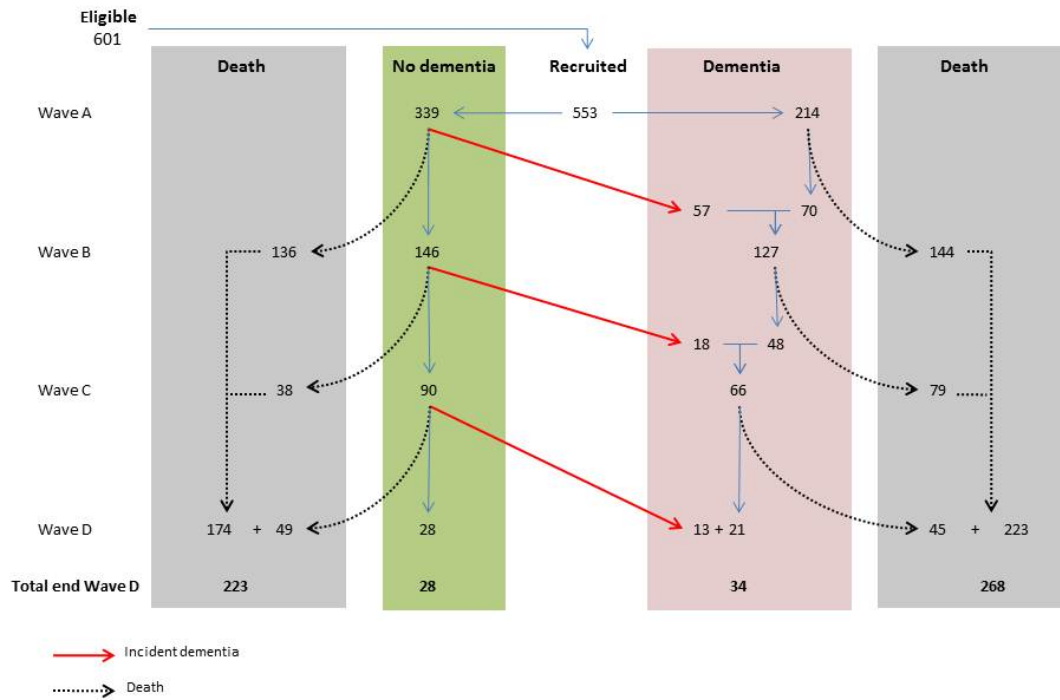

*Measures*

- Mini-Mental State Examination
- Short Portable Mental Status Questionnaire
- Clinical Dementia Rating Scale

Cambridge City over-75s Cohort

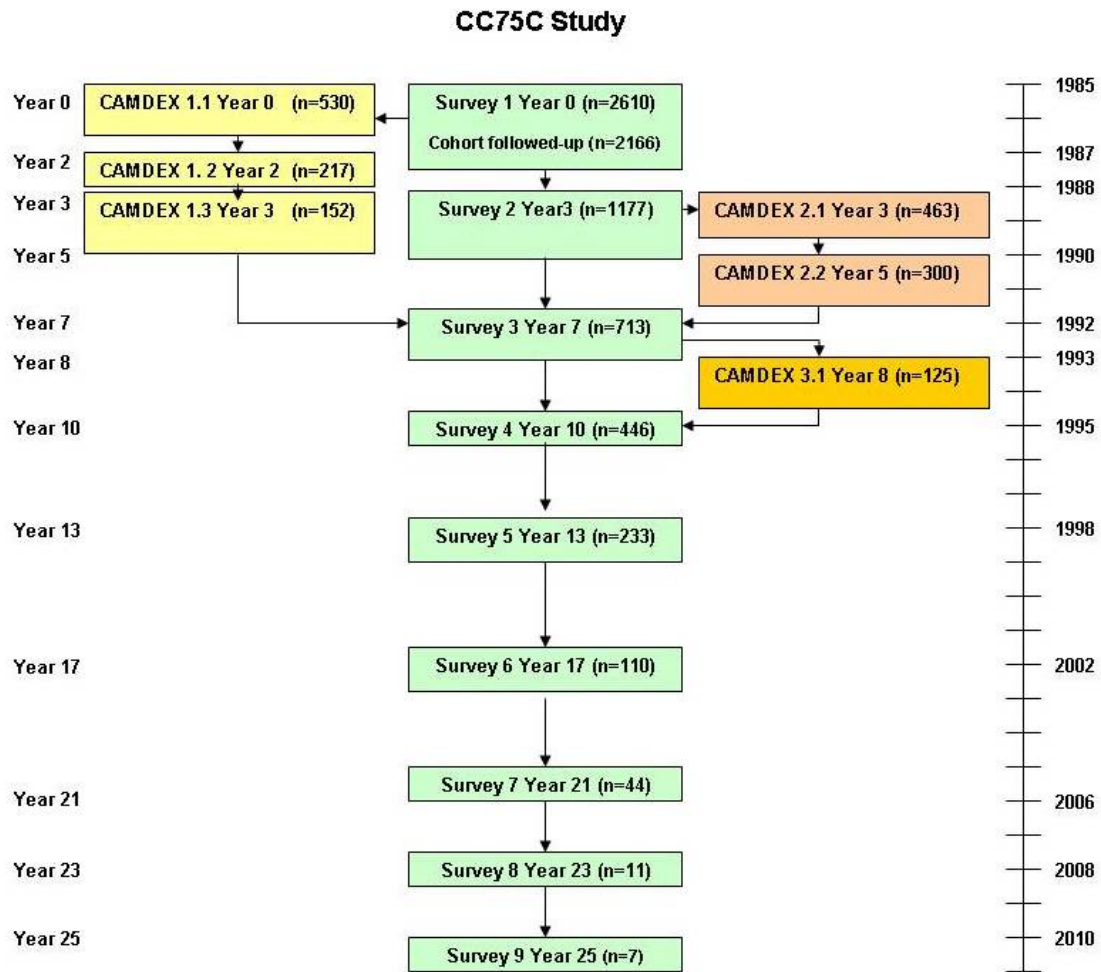

*Measures*

- Mini-Mental State Examination
- Cambridge Mental Disorders of the Elderly Examination
- Retrospective Informant Interview (brain donors)

## MRC Cognitive Function and Ageing Study

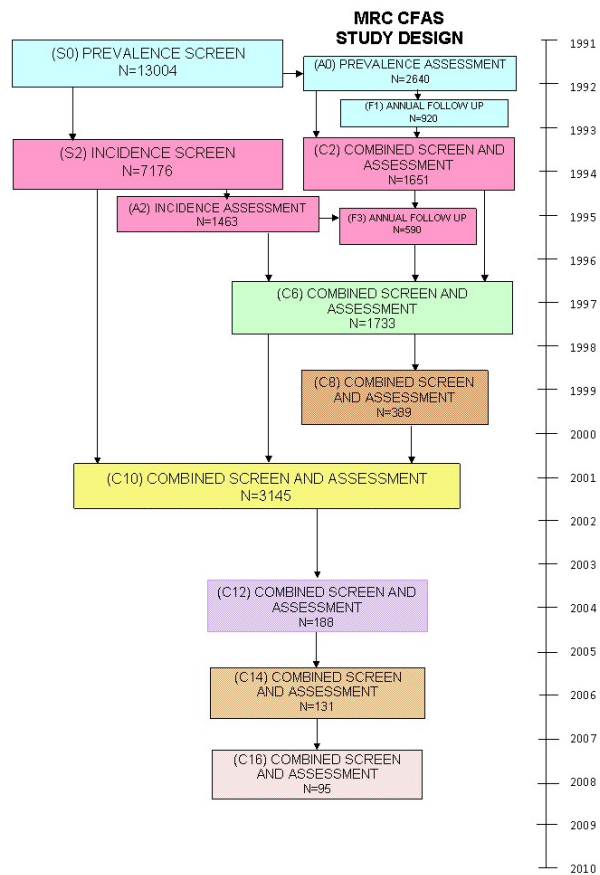

### Measures

- Mini-Mental State Examination
- Geriatric Mental State Examination, including History and Aetiology Schedule interview of informants (Assessment subsamples)
- Retrospective Informant Interview (brain donors)
- Full details: <http://www.cfas.ac.uk/pages/bcfasidi/index.html>

## 1. Delirium Questions in CAMDEX (CC75C) and GMS (CFAS)

| Delirium symptom           | CC75C | CFAS | Source      | Item                                                                                                                                                                                                                                                                                            |                                                                                                       |
|----------------------------|-------|------|-------------|-------------------------------------------------------------------------------------------------------------------------------------------------------------------------------------------------------------------------------------------------------------------------------------------------|-------------------------------------------------------------------------------------------------------|
| <i>Attention / Arousal</i> |       | X    | Judgment    | Errors made in clouded consciousness, i.e. subject was falling asleep, under the influence of alcohol, drugs or delirium due to acute physical illness. The individual will be very distractible, unfocused and may drift in and out of consciousness. Often worse in the evening and afternoon |                                                                                                       |
|                            |       |      | X           | Judgment                                                                                                                                                                                                                                                                                        | Errors made in clouded consciousness                                                                  |
|                            | X     | X    | Judgment    | Impaired ability to focus sustain and shift attention                                                                                                                                                                                                                                           |                                                                                                       |
|                            |       | X    | Judgment    | Attention impairment                                                                                                                                                                                                                                                                            |                                                                                                       |
|                            |       | X    | Judgment    | Repeatedly falls asleep                                                                                                                                                                                                                                                                         |                                                                                                       |
|                            |       | X    | Judgment    | Sleepy, but not asleep                                                                                                                                                                                                                                                                          |                                                                                                       |
|                            | X     | X    | Examination | Count backwards from 20 to 1                                                                                                                                                                                                                                                                    |                                                                                                       |
|                            | X     | X    | Examination | Serial 7s                                                                                                                                                                                                                                                                                       |                                                                                                       |
|                            |       |      | X           | Informant                                                                                                                                                                                                                                                                                       | Disturbance of consciousness, that is either being sleepy, or awake but unaware of their surroundings |
|                            |       |      | X           | Informant                                                                                                                                                                                                                                                                                       | Or drowsy now?                                                                                        |
|                            |       | X    | Informant   | Were there marked fluctuations in his/her level of attention or alertness?                                                                                                                                                                                                                      |                                                                                                       |
| <i>Acute</i>               | X     |      | Informant   | Has there been sudden worsening in mental confusion in recent weeks or months, which has continued to the present time?                                                                                                                                                                         |                                                                                                       |
|                            |       | X    | Informant   | Had there been an abrupt change towards mental confusion in the period before the final illness?                                                                                                                                                                                                |                                                                                                       |
| <i>Abnormal perception</i> |       | X    | Informant   | Has s/he been troubled by voices or visions not experienced by others?                                                                                                                                                                                                                          |                                                                                                       |
| <i>Fluctuation</i>         | X     | X    | Informant   | Are there episodes lasting days or weeks when his/her thinking seems quite clear and then becomes muddled?                                                                                                                                                                                      |                                                                                                       |
|                            |       | X    | Informant   | Are there long periods during the day when s/he is lucid and not confused (that is, knows where s/he is and knows what s/he is doing and saying)?                                                                                                                                               |                                                                                                       |
|                            |       | X    | Informant   | Does s/he get confused at night, wander about or talk nonsense?                                                                                                                                                                                                                                 |                                                                                                       |
|                            |       | X    | Informant   | Or at any other time? What about during the day time?                                                                                                                                                                                                                                           |                                                                                                       |

|                         |   |   |           |                                                                                                                                                                                  |
|-------------------------|---|---|-----------|----------------------------------------------------------------------------------------------------------------------------------------------------------------------------------|
|                         | X | X | Informant | Were there periods lasting days or weeks when his/her thinking still seemed quite clear?                                                                                         |
|                         | X | X |           | Were there brief episodes during the 24 hours when s/he seemed much worse and then times when quite clear?                                                                       |
|                         |   | X | Informant | Did s/he become completely normal when the confusion cleared?                                                                                                                    |
|                         | X | X | Informant | Was the confusion worse towards dusk or evening?                                                                                                                                 |
| <i>Duration</i>         | X | X | Informant | How long has this difficulty been present (months)?                                                                                                                              |
|                         | X | X | Informant | How long had the confusion been present (months)?                                                                                                                                |
| <i>Physical illness</i> | X |   | Judgment  | Is s/he physically ill at present?                                                                                                                                               |
|                         |   | X | Judgment  | Rate if actively physically ill (mild/moderate/severe)                                                                                                                           |
|                         |   | X | Judgment  | Do you think there was anything specific that caused these changes?                                                                                                              |
| <i>Overall</i>          |   | X | Judgment  | Could a physical illness (not drugs or alcohol intoxication) be sufficient explanation for the subject's mental or psychiatric symptoms (e.g. delirious due to acute infection)? |
|                         | X |   | Informant | Did he/she suffer... confusion or delirium... during his/her final illness?                                                                                                      |

Judgment = rated by interviewer

Informant = assessment by informant interview

Examination = direct examination of participant

## 2. Neuropathology methods

### Vantaa 85+

Paraffin-embedded tissue samples were assessed for neuropathology. All specimens were performed by one pathologist using exactly the same dissection and examination protocol, blinded to all clinical data. The protocols for assessing Alzheimer-type,<sup>1,2</sup> vascular,<sup>3,4</sup> and Lewy body<sup>5</sup> pathologies have been described previously. After fixation (phosphate-buffered 4% formaldehyde for at least two weeks), samples were obtained from the middle frontal, superior temporal and middle temporal gyri, and inferior parietal lobule, according to the standard Consortium to Establish a Registry for Alzheimer's Disease (CERAD) protocol.<sup>6</sup>

#### *Alzheimer pathology*

10 $\mu$ m sections were stained with a modified Bielschowsky method for neuritic pathology.<sup>6</sup> For scoring, the maximum density of the neuritic plaques was evaluated in the cortical sections. Tissue blocks were embedded in polyethylene glycol 1,000 and then cut (80 $\mu$ m) for free-floating staining with the Gallyas silver method for neurofibrillary pathology.<sup>7</sup> Apolipoprotein E (ApoE) genotyping was performed using a combination of polymerase chain reaction and solid-phase minisequencing technique.<sup>8</sup> Braak stage is a semi-quantitative measure of neurofibrillary tangle load,<sup>9</sup> and was performed without knowledge of clinical diagnosis, neuritic plaque score or ApoE genotype.

#### *Vascular pathology*

Cavitary lesions or solid cerebral infarcts visible to the naked eye were identified by examination of the intact brain and from 1-cm-thick coronal slices of the cerebral hemispheres, from 5-mm-thick transverse slices of the brain stem and sagittal slices of the cerebellum. These lesions were histologically ascertained to be infarcts ( $\geq 10$ mm diameter), lacunes ( $< 10$ mm) or hemorrhages.

#### *Lewy body pathology*

For the assessment of Lewy body pathology, brain samples were obtained following recommendations of the First DLB Consortium International Workshop<sup>10</sup> and assessed for changes in  $\alpha$ -synuclein pathology.<sup>11</sup> Sections of the substantia nigra were stained with the hematoxylin and eosin (H&E) method and with antibodies against  $\alpha$ -synuclein. If any Lewy bodies were detected in the screened areas, the immunohistochemistry for  $\alpha$ -synuclein was performed on cortical samples. The type of  $\alpha$ -synuclein pathology (none, brainstem-predominant, limbic, diffuse neocortical) was determined for every participant.<sup>5</sup> A semiquantitative grading of the cell loss/atrophy in the

ventrolateral tier of SN pars compacta was determined from none (0) to severe (3), as reported earlier.<sup>5</sup>

### **City of Cambridge over-75s Cohort**

After death, the brains were removed as soon as feasible in the local mortuary. The brains were cut in the sagittal plane. One hemisphere was dissected coronally into approximately one cm slices, macroscopically examined, and snap frozen at  $-80^{\circ}\text{C}$ . All assessments were performed blind to clinical status by neuropathologists at Addenbrooke's Hospital, Cambridge, UK.

#### *Alzheimer pathology*

The CERAD protocol was followed. Typical Alzheimer's lesions were considered by taking the CERAD ratings for neuritic plaques, diffuse plaques, and neurofibrillary tangles in the following areas: entorhinal, hippocampal, frontal, temporal, parietal, and occipital. Ratings for tau reactive tangles were estimated according to Braak stage and ratings for neuritic amyloid- $\beta$ -reactive plaques were estimated according to the age dependent CERAD protocol for all areas.

Tau and amyloid- $\beta$  protein were assessed on immunohistochemical preparations using antibodies obtained from the Cambridge Brain Bank Laboratory. Anti-tau antibody (mAb 11.57) was used to immunostain neurofibrillary tangles, neuritic plaques, and dystrophic neurites. Plaques were assessed using anti-amyloid- $\beta$  antibody (DAKO (M872) Clone 6F/3D). Diffuse amyloid- $\beta$ -reactive plaques were distinguished from neuritic plaques by the presence or absence of dystrophic neurites. All sections were counterstained with Ehrlich's haematoxylin with 3,3'-diaminobenzidine as the chromagen.

#### *Vascular pathology*

Microinfarcts, irrespective of age of infarct, were assessed by their presence or absence in the following areas: entorhinal, hippocampal, frontal, temporal, parietal, occipital, deep grey, and other neocortical and subcortical areas. White matter pallor was assessed as present or absent in the occipital, parietal, frontal, temporal cortices, and as pallor in the deep white matter or internal capsule in slides containing the basal ganglia.

Macroscopic vascular burden was assessed by the number, size, and location of visible macrovascular lesions in any area. The age of the infarct or whether they were present in grey or white matter was not noted. The arterial distribution for the largest infarct involved was recorded.



Number of lacunes was recorded in categories of 0, 1–4, 5–9, or 10 or more in each of the following locations: basal ganglia, thalamus, cerebral white matter, brainstem, and other. For diagnostic purposes, blocks for paraffin embedding were taken from: the hippocampus (at the level of the lateral geniculate body), entorhinal cortex (at the level of the mammillary body), frontal, temporal, parietal, and occipital lobes, the basal ganglia, thalamus, pons, medulla, cerebellum, and from two levels of the midbrain. The tissue blocks included subcortical white matter, deep cerebral white matter, and the internal capsule.

Ten micrometer thick sections were stained with hematoxylin and eosin to qualitatively assess white matter pallor, perivascular gliosis, presence of microinfarcts, and microvascular changes in each area sampled. Separate scores were recorded in white and grey matter for V-R space expansion, perivascular gliosis, and microinfarcts. Small-vessel disease was defined as presence of white matter pallor, perivascular gliosis or 'other' microscopic vascular disease.

#### *Lewy body pathology*

Lewy bodies were assessed by their presence or absence in entorhinal, hippocampal, frontal, or temporal areas and, in addition, in the substantia nigra, nucleus basalis, dorsal raphe nucleus, locus coeruleus, and dorsal vagal nucleus. Sections were either immunolabelled with anti-ubiquitin antibody (pAb BR 251 DAKO Z0458, early cases) or anti- $\alpha$ -synuclein antibody (Biomol International SA3400, later cases), or stained with haematoxylin and eosin to visualize Lewy bodies..

#### **MRC Cognitive Function and Ageing Study**

At necropsy, frozen samples of brain tissue were removed for storage. The remainder of the brain was fixed for standardized assessment on paraffin-embedded tissues, following the CERAD protocol with minor modifications (see the MRC CFAS website: [www.cfas.ac.uk](http://www.cfas.ac.uk)). Neuropathological examination was carried out without knowledge of clinical or interview data, with semiquantitative rating of specific lesions and a prediction of clinicopathological preliminary diagnosis, according to likely importance. To ensure consistency between the centers, inter-rater reliability was addressed at the start of the study, including circulation of macroscopic brain photographs and microscopic slides.

#### *Alzheimer pathology*

Amyloid protein pathology and neurofibrillary tangles (NFTs) were assessed in the hippocampus (CA1), entorhinal cortex and in the frontal (Brodman Area 8/9), temporal (BA21), occipital (BA17/18)

and parietal (BA7) lobes. Severity of pathology was scored as none, mild, moderate, or severe. Plaque pathology was assessed with Congo red, silver stains (including Bielschowsky, Palmgren and Gallyas), or immunohistochemistry. NFTs were assessed with immunohistochemistry (mAb AT8 or mAb 11/57). All slides were counterstained with Ehrlich's hematoxylin and visualized with 3,3'-diaminobenzidine. For this analysis, burden of classical AD features was taken from the CERAD ratings in the entorhinal and hippocampal regions combined and in the neocortex. Each variable was defined as the maximum score in each region.

#### *Vascular pathology*

Vascular pathologies were assessed for each area examined using hematoxylin-eosin slides. Cerebrovascular pathology measures included the presence or absence of hemorrhages, infarcts (parenchymal ischemic lesions >10 mm), lacunes (parenchymal ischemic lesions <10 mm) and small vessel disease (diffuse pallor of myelin staining in white matter associated with hyaline degeneration of subcortical arteries and arterioles, micro-infarcts or a combination of these features).

#### *Lewy body pathology*

Lewy bodies (LB) were identified using haematoxylin-eosin and ubiquitin immunohistochemistry in the cortices, locus coeruleus, substantia nigra, nucleus basalis of Meynert, raphe nuclei, and dorsal efferent nucleus of vagus nerve.

### 3. Statistical analyses

All analyses were conducted in Stata 12.1 (StataCorp, Texas). Consistent with previous approaches, delirium exposure was operationalized as 'never' or 'ever'.<sup>12</sup> Change in MMSE before death was modeled using a time-to-death random-effects model.<sup>13</sup> We were interested in estimating the final trajectory towards death as this makes relationships with pathological data easier to define. The mean time to death was 5.2 years, and so the intercept for this final trajectory was set (centered) at 6 years. This intercept is not so near point of death such that rates of change (slopes) cannot be estimated, yet not so far from death that the pathology findings at autopsy might not plausibly be related to the estimated parameters. Six years before death is also comparable to intercepts from change-point models of the final trajectory of cognitive decline,<sup>14-16</sup> and in the range observed in other analyses (3 – 8 years).<sup>17</sup>

Terms for time-to-death and delirium were used to model the intercept (-6 years) and slopes. All models were adjusted by age at death (centered at mean age = 90 years), sex (0=men, 1=women), years of education (0-3; 4-7; 8-11; 12 or more) and study (0=Vantaa 85+, 1=CC75C, 2=CFAS). Covariance matrices were unstructured. Model fit was assessed using the Bayesian Information Criterion (BIC), which is based on maximum likelihood with a penalization for number of parameters. Missing data were assumed to be missing-at-random. After fitting models, assumptions were checked visually by constructing Q–Q plots of the standardized residuals.

Four pathological parameters were examined: Braak stage, neocortical amyloid plaques, vascular pathology (large artery infarcts, lacunes or hemorrhage) and Lewy bodies in substantia nigra. In keeping with previous methods, neuropathological variables were dichotomized ('none-mild' = 0; 'moderate-severe' = 1).<sup>12,18,19</sup> This approach allows for simpler interpretation and is more likely to be robust. Individuals were assigned a 'pathology burden score' based on the number of times they scored in the higher category for each of the four markers. Therefore, the overall pathological

burden score ranged between 0 and 4, i.e. being in the lower category for all markers (pathology burden score=0), in the upper category of all four markers (pathology burden score=4) or some combination. Finally, interactions between delirium and pathology burden ([delirium history]\*[pathology score]) in terms of their effect on the intercept (-6 years before death) and slope (rate of change of MMSE).

### Model construction

#### 1. Intercept only model

| mmse        | Coef.     | Std. Err. | z     | P> z  | [95% Conf. Interval] |           |
|-------------|-----------|-----------|-------|-------|----------------------|-----------|
| death_age_c | -.1628004 | .0320588  | -5.08 | 0.000 | -.2256344            | -.0999663 |
| sex         | -2.263875 | .3983975  | -5.68 | 0.000 | -3.044719            | -1.48303  |
| cat_educ    |           |           |       |       |                      |           |
| 1           | 1.397545  | 1.000307  | 1.40  | 0.162 | -.563021             | 3.358111  |
| 2           | 1.744542  | 1.53071   | 1.14  | 0.254 | -1.255594            | 4.744679  |
| 3           | 5.476379  | 1.547757  | 3.54  | 0.000 | 2.442832             | 8.509927  |
| study       |           |           |       |       |                      |           |
| 2           | -1.005207 | 1.336974  | -0.75 | 0.452 | -3.625628            | 1.615215  |
| 3           | .1506752  | 1.25684   | 0.12  | 0.905 | -2.312685            | 2.614036  |
| _cons       | 21.78409  | .9334968  | 23.34 | 0.000 | 19.95447             | 23.61371  |

  

| Model | Obs  | ll(null) | ll(model) | df | AIC     | BIC      |
|-------|------|----------|-----------|----|---------|----------|
| .     | 2570 | .        | -7704.098 | 12 | 15432.2 | 15502.42 |

## 2. Add delirium and pathology variables

| mmse        | Coef.     | Std. Err. | z     | P> z  | [95% Conf. Interval] |           |
|-------------|-----------|-----------|-------|-------|----------------------|-----------|
| death_age_c | -.1504382 | .0307454  | -4.89 | 0.000 | -.2106981            | -.0901783 |
| sex         | -2.030025 | .3843093  | -5.28 | 0.000 | -2.783258            | -1.276793 |
| cat_educ    |           |           |       |       |                      |           |
| 1           | 1.491175  | .9153817  | 1.63  | 0.103 | -.3029406            | 3.28529   |
| 2           | .618857   | 1.423069  | 0.43  | 0.664 | -2.170308            | 3.408022  |
| 3           | 3.992727  | 1.439935  | 2.77  | 0.006 | 1.170505             | 6.814948  |
| del_flag    | -2.866873 | .3873046  | -7.40 | 0.000 | -3.625976            | -2.10777  |
| path_level  |           |           |       |       |                      |           |
| 1           | -.0614932 | .5066416  | -0.12 | 0.903 | -1.054493            | .9315061  |
| 2           | -1.644467 | .5098953  | -3.23 | 0.001 | -2.643843            | -.6450903 |
| 3           | -3.945659 | .6210421  | -6.35 | 0.000 | -5.16288             | -2.728439 |
| study       |           |           |       |       |                      |           |
| 2           | -.0610921 | 1.279335  | -0.05 | 0.962 | -2.568543            | 2.446358  |
| 3           | .8247395  | 1.185773  | 0.70  | 0.487 | -1.499332            | 3.148811  |
| _cons       | 23.34317  | .9616507  | 24.27 | 0.000 | 21.45837             | 25.22797  |

  

| Model | Obs  | ll(null) | ll(model) | df | AIC      | BIC      |
|-------|------|----------|-----------|----|----------|----------|
| .     | 2570 | .        | -7653.62  | 16 | 15339.24 | 15432.87 |

## 3. Remove study, add slope:

- Model + study BIC=15433 (model above)
- Model + slope + study = BIC 14988
- Model + slope BIC = 14981 (model below)

| mmse        | Coef.     | Std. Err. | z      | P> z  | [95% Conf. Interval] |           |
|-------------|-----------|-----------|--------|-------|----------------------|-----------|
| death_age_c | -.1998794 | .0293812  | -6.80  | 0.000 | -.2574656            | -.1422932 |
| sex         | -1.926914 | .36447    | -5.29  | 0.000 | -2.641262            | -1.212566 |
| cat_educ    |           |           |        |       |                      |           |
| 1           | 1.113882  | .880197   | 1.27   | 0.206 | -.6112723            | 2.839036  |
| 2           | .3064669  | .828071   | 0.37   | 0.711 | -1.316523            | 1.929456  |
| 3           | 2.007399  | .8433255  | 2.38   | 0.017 | .3545116             | 3.660287  |
| del_flag    | -2.736559 | .360538   | -7.59  | 0.000 | -3.443201            | -2.029918 |
| path_level  |           |           |        |       |                      |           |
| 1           | .0769343  | .4788823  | 0.16   | 0.872 | -.8616579            | 1.015526  |
| 2           | -1.377791 | .4794888  | -2.87  | 0.004 | -2.317572            | -.4380102 |
| 3           | -3.390308 | .5838123  | -5.81  | 0.000 | -4.534559            | -2.246057 |
| ttd         | -.8690382 | .0369577  | -23.51 | 0.000 | -.941474             | -.7966024 |
| _cons       | 23.60515  | .9203264  | 25.65  | 0.000 | 21.80134             | 25.40896  |

  

| Model | Obs  | ll(null) | ll(model) | df | AIC      | BIC      |
|-------|------|----------|-----------|----|----------|----------|
| .     | 2570 | .        | -7431.422 | 15 | 14892.84 | 14980.62 |

#### 4. Add slope terms

| mmse        | Coef.     | Std. Err. | z         | P> z  | [95% Conf. Interval] |           |
|-------------|-----------|-----------|-----------|-------|----------------------|-----------|
| death_age_c | -.2122174 | .0299058  | -7.10     | 0.000 | -.2708317            | -.1536032 |
| sex         | -1.986311 | .3637041  | -5.46     | 0.000 | -2.699157            | -1.273464 |
| cat_educ    |           |           |           |       |                      |           |
| 1           | 1.099545  | .8725966  | 1.26      | 0.208 | -.610713             | 2.809803  |
| 2           | .4186961  | .8215354  | 0.51      | 0.610 | -1.191484            | 2.028876  |
| 3           | 2.175091  | .8373293  | 2.60      | 0.009 | .533956              | 3.816227  |
| del_flag    | -3.711029 | .377406   | -9.83     | 0.000 | -4.450731            | -2.971327 |
| path_level  |           |           |           |       |                      |           |
| 1           | .1229048  | .4783989  | 0.26      | 0.797 | -.8147397            | 1.060549  |
| 2           | -1.311049 | .4787992  | -2.74     | 0.006 | -2.249478            | -.3726195 |
| 3           | -3.398172 | .5820621  | -5.84     | 0.000 | -4.538993            | -2.257351 |
| dageBYttd   | -.0157115 | .00614    | -2.56     | 0.011 | -.0277457            | -.0036773 |
| delBYttd    | -.6439718 | .0739116  | -8.71     | 0.000 | -.7888359            | -.4991076 |
| ttd         | -.6493764 | .0415634  | -15.62    | 0.000 | -.7308392            | -.5679137 |
| _cons       | 23.66975  | .9146661  | 25.88     | 0.000 | 21.87704             | 25.46246  |
| Model       | Obs       | ll(null)  | ll(model) | df    | AIC                  | BIC       |
| .           | 2570      | .         | -7390.871 | 17    | 14815.74             | 14915.22  |

#### Sensitivity analysis for pathology burden score

This was specified by constructing a pathology burden score where the numerator was any instance where pathology was in the higher category and the denominator was total number of pathologies assessed, i.e. a *proportion* of higher category pathologies of pathologies for which the pathology was assessed. This is an alternative formulation to the one used in the main analysis where the denominator was 4, regardless of whether a pathological measure was missing.

The magnitude and direction of coefficients estimated are comparable using either approach.

Mixed-effects ML regression  
Group variable: pid

Number of obs = 2558  
Number of groups = 872  
Obs per group: min = 1  
                  avg = 2.9  
                  max = 7

Log likelihood = -7336.7598

Wald chi2(15) = 1092.16  
Prob > chi2 = 0.0000

| mmse        | Coef.     | Std. Err. | z     | P> z  | [95% Conf. Interval] |           |
|-------------|-----------|-----------|-------|-------|----------------------|-----------|
| death_age_c | -.2057342 | .0299757  | -6.86 | 0.000 | -.2644855            | -.1469829 |
| sex         | -2.014613 | .3658166  | -5.51 | 0.000 | -2.7316              | -1.297626 |
| cat_educ    |           |           |       |       |                      |           |
| 1           | 1.052917  | .870749   | 1.21  | 0.227 | -.6537199            | 2.759553  |
| 2           | .1762173  | .8214934  | 0.21  | 0.830 | -1.43388             | 1.786315  |
| 3           | 1.948117  | .837429   | 2.33  | 0.020 | .306786              | 3.589447  |
| del_flag    | -3.128511 | .8932198  | -3.50 | 0.000 | -4.87919             | -1.377832 |
| path_level  |           |           |       |       |                      |           |
| 1           | -.6234385 | .5687676  | -1.10 | 0.273 | -1.738202            | .4913255  |
| 2           | -2.109604 | .5718232  | -3.69 | 0.000 | -3.230357            | -.988851  |
| 3           | -4.188868 | .6606035  | -6.34 | 0.000 | -5.483627            | -2.894109 |
| delBYttd    | -.4713217 | .1268428  | -3.72 | 0.000 | -.719929             | -.2227144 |
| dageBYttd   | -.0119185 | .0060676  | -1.96 | 0.049 | -.0238107            | -.0000263 |
| panyBYttd   | -.4221593 | .0898178  | -4.70 | 0.000 | -.598199             | -.2461196 |
| p*d_int     | -.6414385 | .972274   | -0.66 | 0.509 | -2.547061            | 1.264184  |
| p*d_slpe    | -.3581438 | .2519654  | -1.42 | 0.155 | -.8519869            | .1356992  |
| ttd         | -.3219956 | .0802394  | -4.01 | 0.000 | -.4792619            | -.1647292 |
| _cons       | 24.53638  | .9560552  | 25.66 | 0.000 | 22.66255             | 26.41022  |

Where Braak stage was missing in CFAS cases, a measure for neurofibrillary tangle burden was constructed using the following rules:

- Higher Braak stage = any rating of 'moderate' or 'severe' score in any neocortical region
- Higher Braak stage = any rating of 'moderate' or 'severe' score in hippocampal or entorhinal cortex
- Lower Braak stage = any rating of 'none' or 'mild' score in hippocampal or entorhinal cortex

This algorithm gave 100% sensitivity and 100% specificity for cases with Braak stage, where scores of 0/1/2/3 were defined as 'Lower Braak Stage' and scores of 4/5/6 were defined as 'Higer Braak stage'

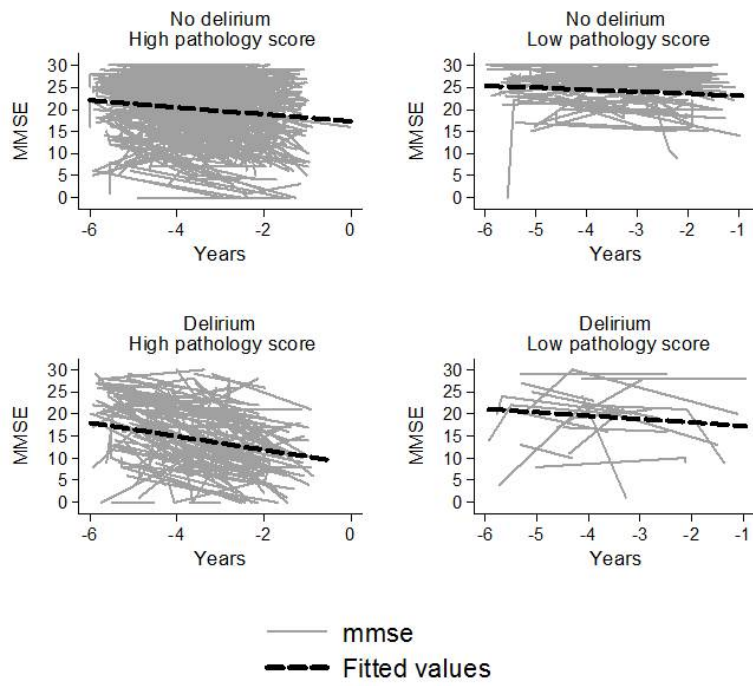



## References

1. Polvikoski T, Sulkava R, Haltia M, et al. Apolipoprotein E, dementia, and cortical deposition of beta-amyloid protein. *The New England journal of medicine* 1995;333:1242-7.
2. Polvikoski T, Sulkava R, Rastas S, et al. Incidence of dementia in very elderly individuals: a clinical, neuropathological and molecular genetic study. *Neuroepidemiology* 2006;26:76-82.
3. Rastas S, Verkkoniemi A, Polvikoski T, et al. Atrial fibrillation, stroke, and cognition: a longitudinal population-based study of people aged 85 and older. *Stroke* 2007;38:1454-60.
4. Ahtiluoto S, Polvikoski T, Peltonen M, et al. Diabetes, Alzheimer disease, and vascular dementia: a population-based neuropathologic study. *Neurology* 2010;75:1195-202.
5. Oinas M, Polvikoski T, Sulkava R, et al. Neuropathologic findings of dementia with lewy bodies (DLB) in a population-based Vantaa 85+ study. *J Alzheimers Dis* 2009;18:677-89.
6. Mirra SS, Heyman A, McKeel D, et al. The Consortium to Establish a Registry for Alzheimer's Disease (CERAD). Part II. Standardization of the neuropathologic assessment of Alzheimer's disease. *Neurology* 1991;41:479-86.
7. Kondoh H, Matsushita M, Kosaka K, Miyazaki N. Staining senile plaques using Bodian's method modified with methenamine. *Biotech Histochem* 1993;68:113-6.
8. Syvanen AC, Sajantila A, Lukka M. Identification of individuals by analysis of biallelic DNA markers, using PCR and solid-phase minisequencing. *Am J Hum Genet* 1993;52:46-59.
9. Braak H, Braak E. Neuropathological stageing of Alzheimer-related changes. *Acta Neuropathol* 1991;82:239-59.
10. McKeith IG, Galasko D, Kosaka K, et al. Consensus guidelines for the clinical and pathologic diagnosis of dementia with Lewy bodies (DLB): report of the consortium on DLB international workshop. *Neurology* 1996;47:1113-24.
11. McKeith IG, Dickson DW, Lowe J, et al. Diagnosis and management of dementia with Lewy bodies: third report of the DLB Consortium. *Neurology* 2005;65:1863-72.
12. Davis DH, Muniz Terrera G, Keage H, et al. Delirium is a strong risk factor for dementia in the oldest-old: a population-based cohort study. *Brain* 2012;135:2809-16.
13. Piccinin AM, Muniz G, Matthews FE, Johansson B. Terminal decline from within- and between-person perspectives, accounting for incident dementia. *The journals of gerontology Series B, Psychological sciences and social sciences* 2011;66:391-401.
14. Wilson RS, Beck TL, Bienias JL, Bennett DA. Terminal cognitive decline: accelerated loss of cognition in the last years of life. *Psychosomatic medicine* 2007;69:131-7.
15. Wilson RS, Segawa E, Hizek LP, Boyle PA, Bennett DA. Terminal dedifferentiation of cognitive abilities. *Neurology* 2012;78:1116-22.
16. MacDonald SW, Hultsch DF, Dixon RA. Aging and the shape of cognitive change before death: terminal decline or terminal drop? *The journals of gerontology Series B, Psychological sciences and social sciences* 2011;66:292-301.
17. Muniz-Terrera G, Matthews FE, Stephan B, Brayne C. Are terminal decline and its potential indicators detectable in population studies of the oldest old? *Int J Geriatr Psychiatry* 2011;26:584-92.
18. Savva GM, Wharton SB, Ince PG, Forster G, Matthews FE, Brayne C. Age, neuropathology, and dementia. *N Engl J Med* 2009;360:2302-9.
19. Brayne C, Ince PG, Keage HA, et al. Education, the brain and dementia: neuroprotection or compensation? *Brain* 2010;133:2210-6.
